# Supplementary material for: The conformations of the macrolide antibiotics erythromycin A, azithromycin and clarithromycin in aqueous solution: a 1H NMR study †
Source: Royal Society of Chemistry journal article supplement (doi:10.1039/b003000g), 2000-01-01
Supplement: b003000g.doc [file b003000g.doc]

# Supplementary Data

**The Conformations of the Macrolide Antibiotics Erythromycin A,**

**Azithromycin and Clarithromycin in Aqueous Solution : A 1H NMR Study**

Abida Awan,a Richard J. Brennan,a Andrew C. Regan,b and Jill Barbera

aSchool of Pharmacy and Pharmaceutical Sciences

bDepartment of Chemistry, University of Manchester, Manchester M13 9PL, U.K.

**Table 1** ROESY connectivities for clarithomycin (4 mM) in 50 mM sodium phosphate buffer in D2O. apparent pH 7.4

|  | 2 | 3 | 4 | 5 | 7r | 7s | 8 | 10 | 11 | 13 | 14r | 14s | 15 | 16 | 17 | 18 | 19 | 20 | 21 | 22 | 1' | 2' | 3' | 4'r | 4's | 5' | 6' | 7'8' | 1" | 2"r  2"s  4"  5"s  6"  7"  8" |
| --- | --- | --- | --- | --- | --- | --- | --- | --- | --- | --- | --- | --- | --- | --- | --- | --- | --- | --- | --- | --- | --- | --- | --- | --- | --- | --- | --- | --- | --- | --- |
| 2 |  |  | s |  |  |  |  |  |  |  |  |  |  | m | l |  |  |  |  |  |  |  |  |  |  |  |  |  |  |  |
| 3 |  |  | m |  |  |  |  |  |  |  |  |  |  | s |  |  |  |  |  | l |  |  |  |  |  |  |  |  | m |  |
| 4 | s | m |  |  |  |  |  |  | l |  |  |  |  |  | m |  |  |  |  |  |  |  |  |  |  |  |  |  |  |  |
| 5 |  |  |  |  |  |  |  |  |  |  |  |  |  |  |  | l |  |  |  | m | l |  |  |  |  |  |  |  |  | l |
| 7r |  |  |  |  |  | l | m |  |  |  |  |  |  |  |  | m | s |  |  |  |  |  |  |  |  |  |  |  |  |  |
| 7s |  |  |  |  | l |  |  | s |  |  |  |  |  |  |  | s |  |  |  |  |  |  |  |  |  |  |  |  |  |  |
| 8 |  |  |  |  | m |  |  |  |  |  |  |  |  |  |  | m | m |  |  |  |  |  |  |  |  |  |  |  |  |  |
| 10 |  |  |  |  |  | m |  |  | l |  |  |  |  |  |  |  | l | l | l |  |  |  |  |  |  |  |  |  |  |  |
| 11 |  |  | l |  |  |  |  | l |  | s |  |  |  |  |  |  |  |  | m |  |  |  |  |  |  |  |  |  |  |  |
| 13 |  |  |  |  |  |  |  |  | s |  | s |  | s |  |  |  |  |  |  |  |  |  |  |  |  |  |  |  |  |  |
| 14r |  |  |  |  |  |  |  |  |  | s |  | l | s |  |  |  |  |  |  |  |  |  |  |  |  |  |  |  |  |  |
| 14ss |  |  |  |  |  |  |  |  |  |  | l |  | s |  |  |  |  |  |  |  |  |  |  |  |  |  |  |  |  |  |
| 15 |  |  |  |  |  |  |  |  |  | s | m | s |  | s |  |  |  |  |  |  |  |  |  |  |  |  |  |  |  |  |
| 16 | m | s |  |  |  |  |  |  |  |  |  |  | s |  |  |  |  |  |  |  |  |  |  |  |  |  |  |  | m |  |
| 17 |  |  | m |  |  |  |  |  |  |  |  |  |  |  |  |  |  |  |  |  | m |  |  |  |  |  |  |  |  | m |
| 18 |  |  |  | m | m |  | l |  |  |  |  |  |  |  |  |  |  |  |  | m |  |  |  |  |  |  |  |  |  |  |
| 19 |  |  |  |  | s | m |  | m |  |  |  |  |  |  |  |  |  |  |  |  |  |  |  |  |  |  |  |  |  |  |
| 20 |  |  |  |  |  |  |  | l |  |  |  |  |  |  |  |  |  |  |  |  |  |  |  |  |  |  |  |  |  |  |
| 21 |  |  |  |  |  |  |  | m | m |  |  |  |  |  |  |  |  |  |  |  |  |  |  |  |  |  |  |  |  |  |
| 22 |  | m |  | m |  |  |  |  |  |  |  |  |  |  |  | m |  |  |  |  |  |  |  |  |  |  |  |  |  | m |
| 1' |  |  |  |  |  |  |  |  |  |  |  |  |  |  | m |  |  |  |  |  |  | s | s |  |  | m | *m* |  |  | m  s |
| 2' |  |  |  |  |  |  |  |  |  |  |  |  |  |  |  |  |  |  |  |  | s |  |  |  | *s* |  |  | l |  |  |
| 3' |  |  |  |  |  |  |  |  |  |  |  |  |  |  |  |  |  |  |  |  |  |  |  |  | m | s |  | l |  |  |
| 4'r |  |  |  |  |  |  |  |  |  |  |  |  |  |  |  |  |  |  |  |  |  |  |  |  | l |  |  | m |  |  |
| 4's |  |  |  |  |  |  |  |  |  |  |  |  |  |  |  |  |  |  |  |  |  | *s* | m | l |  | s | m | m |  |  |
| 5' |  |  |  |  |  |  |  |  |  |  |  |  |  |  |  |  |  |  |  |  | m |  | s |  | s |  | l |  |  | s |
| 6' |  |  |  |  |  |  |  |  |  |  |  |  |  |  |  |  |  |  |  |  | *m* |  |  |  | m | l |  |  |  | m |
| 7'8' |  |  |  |  |  |  |  |  |  |  |  |  |  |  |  |  |  |  |  |  |  |  | l | l | m | m |  |  |  |  |
| 1" |  | m |  |  |  |  |  |  |  |  |  |  |  | m |  |  |  |  |  |  |  |  |  |  |  |  |  |  |  | s  m |
| 2"r |  |  |  |  |  |  |  |  |  |  |  |  |  |  |  |  |  |  |  |  |  |  |  |  |  |  |  |  | s | l  s  m |
| 2"s |  |  |  |  |  |  |  |  |  |  |  |  |  |  |  |  |  |  |  |  |  |  |  |  |  |  |  |  | m | l  m  m |
| 4" |  |  |  |  |  |  |  |  |  |  |  |  |  |  |  |  |  |  |  |  |  |  |  |  |  |  |  |  |  | s  s  l  m |
| 5" |  |  |  | l |  |  |  |  |  |  |  |  |  |  |  |  |  |  |  |  | m |  |  |  |  | s | l |  |  | s  l |
| 6" |  |  |  |  |  |  |  |  |  |  |  |  |  |  |  |  |  |  |  | m |  |  |  |  |  |  |  |  |  | m  l |
| 7" |  |  |  |  |  |  |  |  |  |  |  |  |  |  |  |  |  |  |  |  |  |  |  |  |  |  |  |  |  | m  l  m  m |
| 8" |  |  |  |  |  |  |  |  |  |  |  |  |  |  | m |  |  |  |  |  | s |  |  |  |  |  |  |  |  | m  m |

Italic script indicates signals attributed to spin diffusion. (This is difficult to eliminate from the desosamine ring without introduction of other artefacts.)

The two halves of the chart represent the two halves of the NMR spectrum in this and the following tables.

**Table 2** ROESY connectivities for erythromycin A 9-ketone (total erythromycin A 8 mM) in 50 mM phosphate buffer in D2O, apparent pH 7.4, 45°C.

Bold upper case script indicates signals attributed to the 8-*endo*-folded-out conformation.

Upper case italic script indicates signals attributed to the cyclisable conformation.

Lower case italic script indicates signals attributed to spin diffusion.

|  | 2 | 3 | 4 | 5 | 7r | 7s | 8 | 10 | 11 | 13 | 14r | 14s | 15 | 16 | 17 | 18 | 19 | 20 | 21 | 1' | 2' | 3' | 4'r | 4's | 5' | 6' | 7'8' | 1" | 2"r | 2"s  4"  5"s  6"  7"  8" |
| --- | --- | --- | --- | --- | --- | --- | --- | --- | --- | --- | --- | --- | --- | --- | --- | --- | --- | --- | --- | --- | --- | --- | --- | --- | --- | --- | --- | --- | --- | --- |
| 2 |  |  | s |  |  |  |  |  |  |  |  |  |  | m | m |  |  |  |  |  |  |  |  |  |  |  |  |  |  |  |
| 3 |  |  | m | m |  |  |  |  |  |  |  |  |  |  |  |  |  |  |  |  |  |  |  |  |  |  |  | m |  |  |
| 4 | s | s |  |  |  | s |  |  | m |  |  |  |  |  | l |  |  |  |  |  |  |  |  |  |  |  |  |  |  |  |
| 5 |  | m | s |  |  |  |  |  |  |  |  |  |  |  | s | m |  |  |  | m |  |  |  |  |  |  |  |  |  | m  s |
| 7r |  |  |  |  |  | l |  |  |  |  |  |  |  |  |  | s | s |  |  |  |  |  |  |  |  |  |  |  |  |  |
| 7s |  |  | s |  | l |  |  | m | s |  |  |  |  |  |  |  |  |  |  |  |  |  |  |  |  |  |  |  |  |  |
| 8 |  |  |  |  | s |  |  |  | **S** |  |  |  |  |  |  | m | m |  |  |  |  |  |  |  |  |  |  |  |  |  |
| 10 |  |  |  |  | m |  |  |  | m |  |  |  |  |  |  |  | s | l | l |  |  |  |  |  |  |  |  |  |  |  |
| 11 |  |  | m |  |  | s | **S** | m |  | m |  |  |  |  |  |  |  | *S* | m |  |  |  |  |  |  |  |  |  |  |  |
| 13 |  |  |  |  |  |  |  |  | m |  | s |  | s |  |  |  |  |  | *S* |  |  |  |  |  |  |  |  |  |  |  |
| 14r |  |  |  |  |  |  |  |  |  | s |  | m | s |  |  |  |  |  |  |  |  |  |  |  |  |  |  |  |  |  |
| 14ss |  |  |  |  |  |  |  |  |  |  | m |  | s |  |  |  |  |  | m |  |  |  |  |  |  |  |  |  |  |  |
| 15 |  |  |  |  |  |  |  |  |  | s | m | s |  | s |  |  |  |  |  |  |  |  |  |  |  |  |  |  |  |  |
| 16 | m |  | s |  |  |  |  |  |  |  |  |  | s |  | **S** |  |  |  |  |  |  |  |  |  |  |  |  | m |  | s |
| 17 | m |  | l |  |  |  |  |  |  |  |  |  |  | **S** |  |  |  |  |  | s |  |  |  |  |  |  |  |  |  | s |
| 18 |  |  |  | m |  | s | m |  |  |  |  |  |  |  |  |  |  |  |  |  |  |  |  |  |  |  |  |  |  | m |
| 19 |  |  |  |  |  | s | m | s |  |  |  |  |  |  |  |  |  |  |  |  |  |  |  |  |  |  |  |  |  |  |
| 20 |  |  |  |  |  |  |  | l | *S* |  |  |  |  |  |  |  |  |  |  |  |  |  |  |  |  |  |  |  |  |  |
| 21 |  |  |  |  |  |  |  | m | m | *S* |  | s |  |  |  |  |  |  |  |  |  |  |  |  |  |  |  |  |  |  |
| 1' |  |  |  | m |  |  |  |  |  |  |  |  |  |  | s |  |  |  |  |  |  | s |  |  | m |  |  |  |  | m  s |
| 2' |  |  |  |  |  |  |  |  |  |  |  |  |  |  |  |  |  |  |  |  |  |  | s | s | *s* |  | l |  |  |  |
| 3' |  |  |  |  |  |  |  |  |  |  |  |  |  |  |  |  |  |  |  | s |  |  |  | s | s |  | m |  |  | s |
| 4'r |  |  |  |  |  |  |  |  |  |  |  |  |  |  |  |  |  |  |  |  | s |  |  | l |  | s | m |  |  |  |
| 4's |  |  |  |  |  |  |  |  |  |  |  |  |  |  |  |  |  |  |  |  |  | s | l |  | m | s | m |  |  |  |
| 5' |  |  |  |  |  |  |  |  |  |  |  |  |  |  |  |  |  |  |  | m | *s* | s |  | m |  | m |  |  |  | s |
| 6' |  |  |  |  |  |  |  |  |  |  |  |  |  |  |  |  |  |  |  |  |  |  | s | s | m |  | *s* |  |  |  |
| 7'8' |  |  |  |  |  |  |  |  |  |  |  |  |  |  |  |  |  |  |  |  | l | l | m | m |  | *s* |  |  |  |  |
| 1" |  | l |  |  |  |  |  |  |  |  |  |  |  | l |  |  |  |  |  |  |  |  |  |  |  |  |  |  | m | s |
| 2"r |  |  |  |  |  |  |  |  |  |  |  |  |  |  |  |  |  |  |  |  |  |  |  |  |  |  |  | m |  | l  s  m |
| 2"s |  |  |  |  |  |  |  |  |  |  |  |  |  | s |  |  |  |  |  |  |  |  |  |  |  |  |  | s | l | m  s |
| 4" |  |  |  |  |  |  |  |  |  |  |  |  |  |  |  |  |  |  |  |  |  |  |  |  |  |  |  |  | m | m  m |
| 5" |  |  |  | m |  |  |  |  |  |  |  |  |  |  |  |  |  |  |  | m |  |  |  |  | m |  |  |  |  | m |
| 6" |  |  |  | s |  |  |  |  |  |  |  |  |  |  |  | s |  |  |  |  |  |  |  |  |  |  |  |  |  | m  m |
| 7" |  |  |  |  |  |  |  |  |  |  |  |  |  |  |  |  |  |  |  |  |  |  |  |  |  |  |  |  | m | s  m  l |
| 8" |  |  |  |  |  |  |  |  |  |  |  |  |  |  | l |  |  |  |  | s |  | s |  |  |  |  |  |  |  | m  l |

**Table 3** ROESY connectivities for erythromycin A 9,12-hemiacetal (total erythromcyin A 8 mM) in 50 mM phosphate buffer in D2O, apparent pH 7.4, 45°C.

|  | 2 | 3 | 4 | 5 | 7r | 7s | 8 | 10 | 11 | 13 | 14r | 14s | 15 | 16 | 17 | 18 | 19 | 20 | 21 | 1' | 2' | 3' | 4'r | 4's | 5' | 6' | 7'8' | 1" | 2"r | 2"s  4"  5"s  6"  7"  8" |
| --- | --- | --- | --- | --- | --- | --- | --- | --- | --- | --- | --- | --- | --- | --- | --- | --- | --- | --- | --- | --- | --- | --- | --- | --- | --- | --- | --- | --- | --- | --- |
| 2 |  |  | m |  |  |  |  |  |  |  |  |  |  | m |  |  |  |  |  |  |  |  |  |  |  |  |  |  |  |  |
| 3 |  |  |  | m |  |  |  |  |  |  |  |  |  |  |  |  |  |  |  |  |  |  |  |  |  |  |  | m |  |  |
| 4 | m |  |  |  |  |  |  |  |  |  |  |  |  |  | m | m |  |  |  |  |  |  |  |  |  |  |  |  |  |  |
| 5 |  | m |  |  |  |  |  |  |  |  |  |  |  |  |  |  |  |  |  | m |  |  |  |  |  |  |  |  |  |  |
| 7r |  |  |  |  |  |  |  |  |  |  |  |  |  |  |  |  |  |  |  |  |  |  |  |  |  |  |  |  |  |  |
| 7s |  |  |  |  |  |  |  | m |  |  |  |  |  |  |  |  |  |  |  |  |  |  |  |  |  |  |  |  |  |  |
| 8 |  |  |  |  |  |  |  |  |  |  |  |  |  |  |  |  | m |  |  |  |  |  |  |  |  |  |  |  |  |  |
| 10 |  |  |  |  |  | m |  |  |  |  |  |  |  |  |  |  |  | m |  |  |  |  |  |  |  |  |  |  |  |  |
| 11 |  |  |  |  |  |  |  |  |  |  |  |  |  |  |  |  |  | m | m |  |  |  |  |  |  |  |  |  |  |  |
| 13 |  |  |  |  |  |  |  |  |  |  | m |  |  |  |  |  |  |  | m |  |  |  |  |  |  |  |  |  |  |  |
| 14r |  |  |  |  |  |  |  |  |  | m |  |  |  |  |  |  |  |  | m |  |  |  |  |  |  |  |  |  |  |  |
| 14ss |  |  |  |  |  |  |  |  |  |  |  |  |  |  |  |  |  |  |  |  |  |  |  |  |  |  |  |  |  |  |
| 15 |  |  |  |  |  |  |  |  |  |  |  |  |  |  |  |  |  |  |  |  |  |  |  |  |  |  |  |  |  |  |
| 16 |  |  |  |  |  |  |  |  |  |  |  |  |  |  |  |  |  |  |  |  |  |  |  |  |  |  |  | m |  | m |
| 17 |  |  | m |  |  |  |  |  |  |  |  |  |  |  |  |  |  |  |  |  |  |  |  |  |  |  |  |  |  |  |
| 18 |  |  | m |  |  |  |  |  |  |  |  |  |  |  |  |  |  |  |  |  |  |  |  |  |  |  |  |  |  |  |
| 19 |  |  |  |  |  |  | m |  |  |  |  |  |  |  |  |  |  |  |  |  |  |  |  |  |  |  |  |  |  |  |
| 20 |  |  |  |  |  |  |  | m | m |  |  |  |  |  |  |  |  |  |  |  |  |  |  |  |  |  |  |  |  |  |
| 21 |  |  |  |  |  |  |  |  | m | m | l |  |  |  |  |  |  |  |  |  |  |  |  |  |  |  |  |  |  |  |
| 1' |  |  |  | m |  |  |  |  |  |  |  |  |  |  |  |  |  |  |  |  |  |  |  |  | m |  |  |  |  |  |
| 2' |  |  |  |  |  |  |  |  |  |  |  |  |  |  |  |  |  |  |  |  |  |  |  |  |  |  |  |  |  |  |
| 3' |  |  |  |  |  |  |  |  |  |  |  |  |  |  |  |  |  |  |  |  |  |  |  |  |  |  |  |  |  |  |
| 4'r |  |  |  |  |  |  |  |  |  |  |  |  |  |  |  |  |  |  |  |  |  |  |  |  |  |  |  |  |  |  |
| 4's |  |  |  |  |  |  |  |  |  |  |  |  |  |  |  |  |  |  |  |  |  |  |  |  |  |  |  |  |  |  |
| 5' |  |  |  |  |  |  |  |  |  |  |  |  |  |  |  |  |  |  |  |  | m |  |  |  |  |  |  |  |  |  |
| 6' |  |  |  |  |  |  |  |  |  |  |  |  |  |  |  |  |  |  |  |  |  |  |  |  |  |  |  |  |  |  |
| 7'8' |  |  |  |  |  |  |  |  |  |  |  |  |  |  |  |  |  |  |  |  |  |  |  |  |  |  |  |  |  |  |
| 1" |  | l |  |  |  |  |  |  |  |  |  |  |  | m |  |  |  |  |  |  |  |  |  |  |  |  |  |  | m |  |
| 2"r |  |  |  |  |  |  |  |  |  |  |  |  |  |  |  |  |  |  |  |  |  |  |  |  |  |  |  | m |  | l |
| 2"s |  |  |  |  |  |  |  |  |  |  |  |  |  |  |  |  |  |  |  |  |  |  |  |  |  |  |  |  | l | m  m |
| 4" |  |  |  |  |  |  |  |  |  |  |  |  |  |  |  |  |  |  |  |  |  |  |  |  |  |  |  |  |  |  |
| 5" |  |  |  |  |  |  |  |  |  |  |  |  |  |  |  |  |  |  |  |  |  |  |  |  |  |  |  |  |  | m |
| 6" |  |  |  |  |  |  |  |  |  |  |  |  |  |  |  |  |  |  |  |  |  |  |  |  |  |  |  |  |  | m |
| 7" |  |  |  |  |  |  |  |  |  |  |  |  |  |  |  |  |  |  |  |  |  |  |  |  |  |  |  |  | m |  |
| 8" |  |  |  |  |  |  |  |  |  |  |  |  |  |  |  |  |  |  |  |  |  |  |  |  |  |  |  |  | m |  |

**Table 4** ROESY connectivities for azithromycin (4 mM) in 50 mM phosphate buffer in

D2O, apparent pH 7.4.

Signals indicated in upper case italics may be due to a trace of folded-in azithromcyin.

Signals in lower case italics are attributed to spin diffusion.

|  | 2 | 3 | 4 | 5 | 7r | 7s | 8 | 9r | 9s | 10 | 11 | 13 | 14r | 14s | 15 | 16 | 17 | 18 | 19 | 20 | 21 | 22 | 1' | 2' | 3' | 4'r | 4's | 5' | 6' | 7'8'  1"  2"r  2"s  4"  5"s  6"  7"  8" |
| --- | --- | --- | --- | --- | --- | --- | --- | --- | --- | --- | --- | --- | --- | --- | --- | --- | --- | --- | --- | --- | --- | --- | --- | --- | --- | --- | --- | --- | --- | --- |
| 2 |  | s | m |  |  |  |  |  |  |  | s |  |  |  |  | l | l |  |  |  |  |  |  |  |  |  |  |  |  |  |
| 3 |  |  | m | m |  |  |  |  |  |  | m |  |  |  |  | *s* | *s* |  |  |  |  |  |  |  |  |  |  |  |  | m |
| 4 | m | m |  |  |  | m |  |  |  |  | m |  |  |  |  |  | l | *S* |  |  |  |  |  |  |  |  |  |  |  |  |
| 5 |  | s |  |  |  |  |  |  |  |  |  |  |  |  |  |  | s | m |  |  |  |  | s |  |  |  |  |  |  | m  m |
| 7r |  |  |  |  |  | l | s |  |  |  |  |  |  |  |  |  |  | m | m |  |  |  |  |  |  |  |  |  |  |  |
| 7s |  |  | m |  | l |  |  | s |  |  | s |  |  |  |  |  |  |  |  |  |  |  |  |  |  |  |  |  |  |  |
| 8 |  |  |  |  | s |  |  |  | s |  | *S* |  |  |  |  |  |  | l | l |  |  | s |  |  |  |  |  |  |  |  |
| 9r |  |  |  |  |  | s |  |  | l | l | s |  |  |  |  |  |  |  | m |  |  |  |  |  |  |  |  |  |  |  |
| 9s |  |  |  |  |  |  | s | l |  |  |  |  |  |  |  |  |  |  | m | s |  |  |  |  |  |  |  |  |  |  |
| 10 |  |  |  |  |  |  |  | m |  |  |  |  |  |  |  |  |  |  |  | l | l |  |  |  |  |  |  |  |  |  |
| 11 | s | m | m |  |  | s | *S* | m |  | m |  | m |  |  |  |  |  |  |  |  | m | s |  |  |  |  |  |  |  |  |
| 13 |  |  |  |  |  |  |  |  |  |  | m |  | m | s | m |  |  |  |  |  |  |  |  |  |  |  |  |  |  |  |
| 14r |  |  |  |  |  |  |  |  |  |  |  | s |  | l | m |  |  |  |  |  | s |  |  |  |  |  |  |  |  |  |
| 14s |  |  |  |  |  |  |  |  |  |  |  |  | l |  | m |  |  |  |  |  | m |  |  |  |  |  |  |  |  |  |
| 15 |  |  |  |  |  |  |  |  |  |  |  | m | m | m |  | s |  |  |  |  |  |  |  |  |  |  |  |  |  |  |
| 16 | l | *s* | m |  |  |  |  |  |  |  |  |  |  |  | s |  | s |  |  |  |  |  |  |  |  |  |  |  |  | m  m |
| 17 | l | *s* | m | s |  |  |  |  |  |  |  |  |  |  |  |  |  |  |  |  |  |  | s |  |  |  |  |  |  | m |
| 18 |  |  | *S* | m |  | s | m |  |  |  |  |  |  |  |  |  |  |  |  |  |  | s |  |  |  |  |  |  |  |  |
| 19 |  |  |  |  | m | *s* | m |  | m |  |  |  |  |  |  |  |  | s |  |  |  |  |  |  |  |  |  |  |  |  |
| 20 |  |  |  |  |  |  |  | m | s |  |  |  |  |  |  |  |  |  |  |  |  | m |  |  |  |  |  |  |  |  |
| 21 |  |  |  |  |  |  |  |  |  | m | m |  | s | m |  |  |  |  |  |  |  |  |  |  |  |  |  |  |  |  |
| 22 |  |  |  |  |  |  | s |  |  |  | s |  |  |  |  |  |  |  |  | m |  |  |  |  |  |  |  |  |  |  |
| 1' |  |  |  | m |  |  |  |  |  |  |  |  |  |  |  |  | m |  |  |  |  |  |  |  | m |  |  | m |  | m  s |
| 2' |  |  |  |  |  |  |  |  |  |  |  |  |  |  |  |  |  |  |  |  |  |  |  |  |  | s |  | *s* |  | m |
| 3' |  |  |  |  |  |  |  |  |  |  |  |  |  |  |  |  |  |  |  |  |  |  | s |  |  | s | m | s |  | l |
| 4'r |  |  |  |  |  |  |  |  |  |  |  |  |  |  |  |  |  |  |  |  |  |  |  | s |  |  | l |  | m | m |
| 4's |  |  |  |  |  |  |  |  |  |  |  |  |  |  |  |  |  |  |  |  |  |  |  |  | s | l |  | m |  | m |
| 5' |  |  |  |  |  |  |  |  |  |  |  |  |  |  |  |  |  |  |  |  |  |  | s |  | s |  | m |  | l | m |
| 6' |  |  |  |  |  |  |  |  |  |  |  |  |  |  |  |  |  |  |  |  |  |  |  |  |  |  |  | l |  |  |
| 7'8' |  |  |  |  |  |  |  |  |  |  |  |  |  |  |  |  |  |  |  |  |  |  |  | m | m | m | m |  |  |  |
| 1" |  | m |  |  |  |  |  |  |  |  |  |  |  |  |  | l |  |  |  |  |  |  |  |  |  |  |  |  |  | m  s |
| 2"r |  |  |  |  |  |  |  |  |  |  |  |  |  |  |  |  |  |  |  |  |  |  |  |  |  |  |  |  |  | l  l  m  *s* |
| 2"s |  |  |  |  |  |  |  |  |  |  |  |  |  |  |  | m |  |  |  |  |  |  |  |  |  |  |  |  |  | m  l  l  l |
| 4" |  |  |  |  |  |  |  |  |  |  |  |  |  |  |  |  |  |  |  |  |  |  |  |  |  |  |  |  |  | m  s  m  m |
| 5" |  |  |  | l |  |  |  |  |  |  |  |  |  |  |  |  |  |  |  |  |  |  | s |  |  |  |  | s |  | l |
| 6" |  |  |  | m |  |  |  |  |  |  |  |  |  |  |  |  |  |  |  |  |  |  |  |  |  |  |  |  |  | m  l |
| 7" |  |  |  |  |  |  |  |  |  |  |  |  |  |  |  |  |  |  |  |  |  |  |  |  |  |  |  |  |  | *s*  m  m  l |
| 8" |  |  |  |  |  |  |  |  |  |  |  |  |  |  |  |  | s |  |  |  |  |  | s |  |  |  |  |  |  | m  l |
